# Supplementary material
Source: Springer Nature journal article supplement (https://www.springermedizin.de/resource/supplementary/12943_2012_1070_MOESM1_ESM.pdf/9552220)

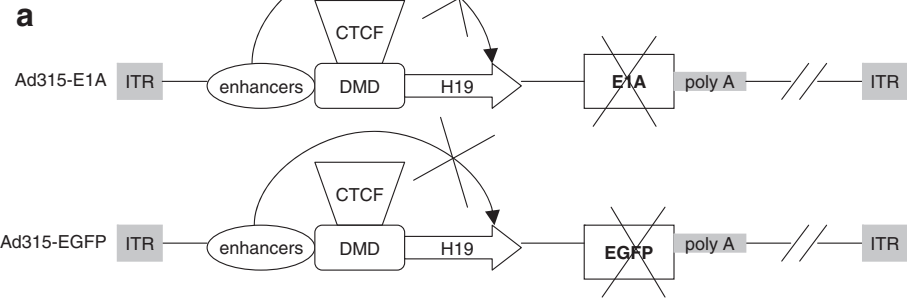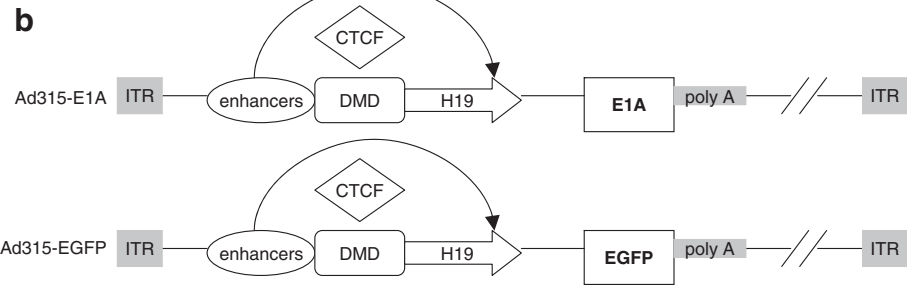

Supplement: MOESM1 [file 9552220]
